# Supplementary material
Source: HighWire-hosted journal article supplement (https://bmjopen.bmj.com/content/10/12/e045593)
Supplement: inline-supplementary-material-1 [file inline-supplementary-material-1.pdf]

## Online Supplemental Material

**Supplemental Table 1.****Demographic characteristics of respondents, N – 763****Age** Mean ± SD (range) 44 ± 15 (18-86)**Sex**

|                |      |     |
|----------------|------|-----|
| Male           | 43.5 | 332 |
| Female         | 52.0 | 397 |
| Other          | 0.3  | 2   |
| Did not answer | 4.2  | 32  |

**Highest level of education**

|                                                                        |       |     |
|------------------------------------------------------------------------|-------|-----|
| Some college but no degree                                             | 24.9% | 190 |
| Professional degree (JD, MD)                                           | 3.5%  | 27  |
| Master's degree                                                        | 11.1% | 85  |
| Less than high school degree                                           | 5.4%  | 41  |
| High school graduate (high school diploma or equivalent including GED) | 16.6% | 127 |
| Doctoral degree                                                        | 1.8%  | 14  |
| Bachelor's degree in college (4-year)                                  | 27.3% | 208 |
| Associate degree in college (2-year)                                   | 9.2%  | 70  |
| Did not answer                                                         | .1%   | 1   |

**Household income**

|                    |       |     |
|--------------------|-------|-----|
| Less than £10,000  | 4.9%  | 37  |
| £10,000 to £19,999 | 15.4% | 116 |
| £20,000 to £29,999 | 22.1% | 166 |
| £30,000 to £39,999 | 15.9% | 120 |
| £40,000 to £49,999 | 11.8% | 89  |
| £50,000 to £59,999 | 8.3%  | 63  |
| £60,000 to £69,999 | 6.5%  | 49  |
| £70,000 to £79,999 | 4.1%  | 31  |
| £80,000 to £89,999 | 2.0%  | 15  |
| £90,000 to £99,999 | 1.7%  | 13  |
| £100,000 to        |       |     |
| £149,999           | 4.3%  | 33  |
| £150,000 or more   | 2.5%  | 19  |
| Did not answer     | 1.6%  | 12  |

**Employment status**

|                                           |       |     |
|-------------------------------------------|-------|-----|
| Working (paid employee)                   | 71.0% | 537 |
| Working (self-employed)                   | 8.6%  | 65  |
| Not working (temporary layoff from a job) | 3.4%  | 26  |
| Not working (looking for work)            | 2.7%  | 21  |
| Not working (retired)                     | 7.5%  | 57  |
| Not working (disabled)                    | 1.1%  | 9   |

|                      |      |    |
|----------------------|------|----|
| Not working (other)  | 4.8% | 37 |
| Prefer not to answer | 0.5% | 4  |
| Did not answer       | .9%  | 7  |

Supplemental Figure 1a

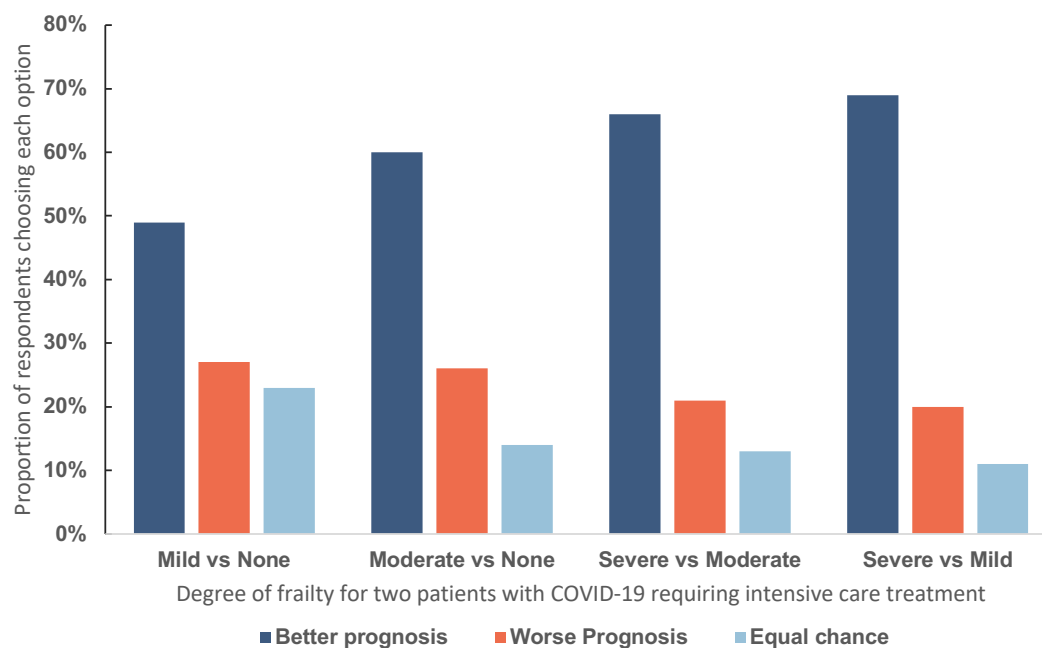

**Supplemental Figure 1a.** Respondent choices in a triage dilemma involving withholding treatment from one of two patients with different degrees of pre-existing frailty but equivalent survival chances and life expectancy.

There was a significant difference in the distribution of answers between scenarios. **1.** Severe/moderate vs severe/mild,  $X^2(3, N = 763) = 6.583, p = .32$  **2.** Severe/moderate vs moderate/none  $X^2(3, N = 763) = 19.85, p < .001$  **3.** Severe/moderate vs mild/none  $X^2(3, N = 763) = 95.669, p < .001$  **4.** Moderate/none vs mild/none  $X^2(3, N = 763) = 69.210, p < .001$ .

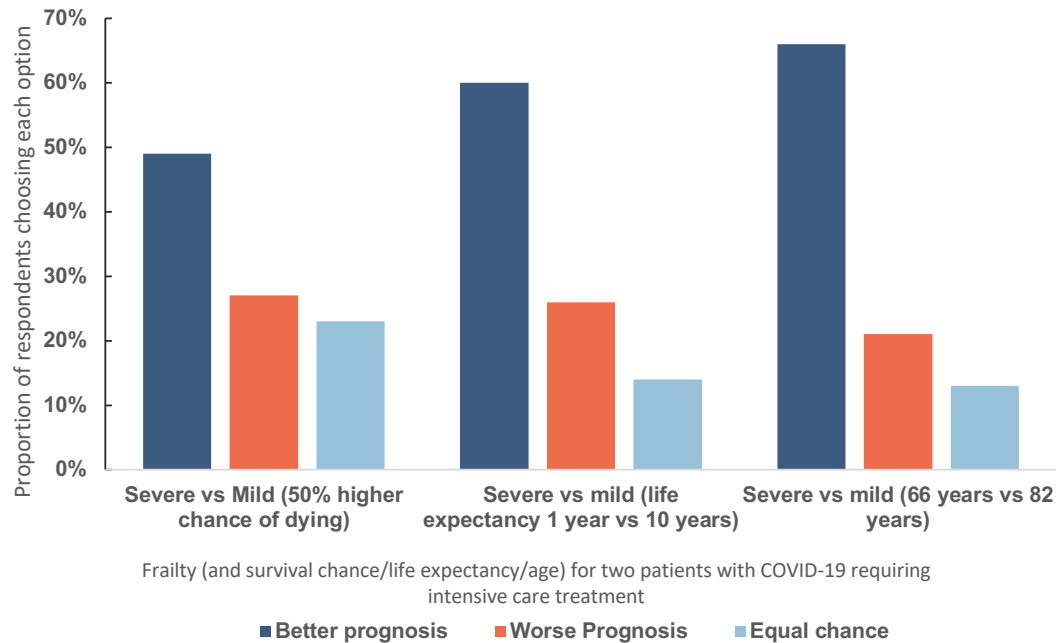

**Supplemental Figure 1b.** Respondent choices in a triage dilemma involving withholding treatment from one of two patients with different degrees of pre-existing frailty but equivalent survival chances, life expectancy or age. In the first two scenarios, the more frail patient had lower survival chance/life expectancy. In the third scenario, the more frail patient was younger.

Severe/mild with reduced life expectancy vs same life expectancy:  $X^2(3, N = 763) = 95.258, p < .001$ ; Severe/mild with increased chance of dying vs same chance:  $X^2(3, N = 763) = 20.85, p < .001$
